# Supplementary material
Source: PubMed Central journal article supplement (PMC3183128)
Supplement: NIHMS297495-supplement-supplement_1.pdf [file NIHMS297495-supplement-supplement_1.pdf]

**Supplementary Table 1: Decline in DLCO% in placebo group over 12 months**

|                                        | <b>N</b>  | <b>Decline in DLCO% predicted, Mean (SD)</b> | <b>P value</b> |
|----------------------------------------|-----------|----------------------------------------------|----------------|
| <b>Disease duration, years</b>         |           |                                              |                |
| 0-2                                    | <b>17</b> | <b>17.9 (26.3)</b>                           | <b>0.03</b>    |
| 2-4                                    | <b>29</b> | <b>2.9 (12.7)</b>                            |                |
| >4                                     | <b>18</b> | <b>8.2 (15.1)</b>                            |                |
| <b>HRCT Fibrosis score</b>             |           |                                              |                |
| 0-2                                    | <b>40</b> | <b>8.3 (16.7)</b>                            | <b>0.22</b>    |
| 3-4                                    | <b>25</b> | <b>8.8 (21.6)</b>                            |                |
| <b>HRCT Ground Glass Opacity score</b> |           |                                              |                |
| 0-1                                    | <b>55</b> | <b>8.0 (18.5)</b>                            | <b>0.32</b>    |
| 2-3                                    | <b>10</b> | <b>11.3 (20.0)</b>                           |                |
| <b>HRCT Honeycombing</b>               |           |                                              |                |
| 0                                      | <b>38</b> | <b>9.0 (19.7)</b>                            | <b>0.43</b>    |
| ≥1                                     | <b>27</b> | <b>7.8 (17.4)</b>                            |                |
| <b>Autoantibodies</b>                  |           |                                              |                |
| SCL-70                                 | <b>17</b> | <b>6.2 (12.7)</b>                            | <b>0.91</b>    |
| Anti-Polymerase-III/ anti-centromere   | <b>5</b>  | <b>7.6 (17.7)</b>                            |                |
| Others                                 | <b>26</b> | <b>9.2 (22.5)</b>                            |                |
| <b>Overall</b>                         | <b>66</b> | <b>8.2 (18.6)</b>                            |                |

**Supplementary Table 2:** Linear mixed effects model assessing decline in FVC% predicted

| Variable                                    | Regression coefficient | Standard error | P-value |
|---------------------------------------------|------------------------|----------------|---------|
| <b>Male sex</b>                             | -0.005                 | 0.02           | 0.97    |
| <b>Past Smoker</b>                          | -.03                   | 0.02           | 0.15    |
| <b>Baseline dyspnea index</b>               | 0.008                  | 0.004          | 0.08    |
| <b>Modified Rodnan skin score</b>           | -0.007                 | 0.0009         | 0.40    |
| <b>Baseline Maximum Fibrosis score</b>      | -0.004                 | 0.009          | 0.66    |
| <b>Month</b>                                | 0.0009                 | 0.002          | 0.68    |
| <b>Month* HRCT Fibrosis score</b>           | -0.003                 | 0.0008         | 0.001   |
| <b>Disease duration*</b>                    |                        |                |         |
| Group A                                     | -.02                   | 0.03           | 0.55    |
| Group B                                     | -0.001                 | 0.03           | 0.95    |
| <b>Disease duration* month interaction#</b> |                        |                |         |
| Month* Group A                              | -0.0005                | 0.002          | 0.82    |
| Month* Group B                              | -0.0003                | 0.002          | 0.87    |
| <b>Autoantibody†</b>                        |                        |                |         |
| Anti-SCL 70                                 | -0.02                  | 0.02           | 0.46    |
| Anti-Polymerase III                         | -0.04                  | 0.03           | 0.18    |

\*Group C is the reference group; #Month\* Group C is the reference group; † Anti-centromere/ others is the reference group
